# Supplementary material
Source: PubMed Central journal article supplement (PMC3161557)

## **SI Materials and Methods**

### **Neuronal Differentiation**

Human ESCs, and iPSCs were differentiated into neuroectodermal cells in EBs using bFGF [1]. Cells were detached from plates by 1mg/ml of dispase treatment. After 30 min incubation, intact cell colonies were harvested by centrifugation, resuspended in hES medium, and then plated on ultralow cell-attachment plates (BD Biosciences) for four days with a daily medium change. Then the medium was switched to neural induction medium (DMEM/F12 supplemented with N2, MEM NEAA solution, 2 mg/ml of heparin, and 20 ng/ml of bFGF) for two days. Next, EBs were plated in laminin-coated plates, and fed with neural induction medium every other day. To continue neuronal maturation, rosette cells were incubated with neural differentiation medium (Neurocult NS-A differentiation medium, Stem Cell Technology). hESCs and iPSCs were also differentiated into neuronal lineage by blocking BMP pathway [2] and used to obtain the neural progenitor cells (NPCS). Here, cells were dissociated by dispase treatment and plated onto ultra-low attachment plates with Neural precursor medium containing B27, bFGF (20ng/ml) and recombinant noggin (500 ng/ml) for first 2 weeks and EBs were maintained with neuro-basal medium with bFGF (20ng/ml) and EGF (20ng/ml) for additional 1 week. Mature EBs were plated onto laminin coated plates and rosettes were visible after 2-5 days. Rosettes were manually collected and cultured in neural induction medium to expand the neural progenitors. For the mature neuronal differentiation, neural progenitors were cultured in Neurocult NS-A differentiation medium.

### **Gene Expression Analysis**

RNA was isolated from cells and used to generate cDNA by Superscript II® (Invitrogen) according to the manufacturer's protocol. The expression of pluripotency markers or differentiation markers was calculated by performing real time quantitative PCR using the DyNAmo™ SYBR® Green qPCR kit (NEB). The qPCR data were analyzed by comparative threshold cycle (CT) method (delta-delta CT method) [3]. All qPCR assays were performed in triplicates with  $\beta$ -ACTIN as a reference and with the primers listed in Supplementary Table 2. Primers for recognizing total genes, endogenous genes, and ectopic genes used for reprogramming (OCT4, SOX2, KLF4, MYC) were listed in Supplementary table 2. In order to find the allele specific expression of MeCP2, primers that specifically bound the known mutated nucleotides of MeCP2 (Supplementary Table 3) were used to amplify specific regions of MeCP2, and sequenced.

### **Immunostaining**

iPSCs were fixed with 4% paraformaldehyde and immunostained for pluripotency markers using the antibodies listed in Supplementary Table 4. In order to confirm the status of X chromosomes, parental fibroblast and iPSCs were fixed, stained with OCT4 and H3K27me3 antibodies. After neuronal differentiation, cells were fixed and used to confirm the expression of neuronal markers using antibodies listed in Supplemental Table 4. For the comparison between wild type RTT-iPSCs and mutant RTT-iPSCs in Figure 3C and 3D, we have performed four independent neuronal differentiation experiments. Three cellular images were taken from the representative experiment to calculate the percentage of cells expressing NESTIN, GFAP, or TuJ. Image-J software was used to process the NESTIN, GFAP, and TuJ images and to calculate the percentage of cells expressing the markers [4].

### **Teratoma Formation Assay**

$2-3 \times 10^6$  iPSCs were collected by collagenase treatment, and resuspended in DMEM/F12, collagen, and matrigel mix (2:1:1 ratio). Cells were intramuscularly injected into immunodeficient Rag2<sup>-/-</sup> GammaC<sup>-/-</sup> mice. After 6–8 weeks, teratomas were harvested, fixed, and subjected to paraffin-embedding and haematoxylin and eosin (H/E) staining.

### **Karyotypes**

Chromosomal analysis of iPSCs was performed by Cell Line Genetics (Madison, WI) using standard high-resolution G banding.

### **Determination of Apoptotic Cells**

RTT-iPS cell derived NPCs were differentiated into mature neuron on Laminin /Poly-L-lysine coated plates. NPCs and 8 day differentiated neurons were treated with trypsin and accutase, and subjected to apoptosis assay using Annexin V–FITC/PI Apoptosis Detection Kit (BD Pharmingen) according to the manufacturer's protocol. Apoptotic cell death was also examined by trypan blue staining.

1. Li, X.J., and Zhang, S.C. (2006). In vitro differentiation of neural precursors from human embryonic stem cells. *Methods Mol Biol* 331, 169-177.
2. Gerrard, L., Rodgers, L., and Cui, W. (2005). Differentiation of human embryonic stem cells to neural lineages in adherent culture by blocking bone morphogenetic protein signaling. *Stem Cells* 23, 1234-1241.
3. Livak, K.J., and Schmittgen, T.D. (2001). Analysis of relative gene expression data using real-time quantitative PCR and the 2<sup>(-Delta Delta C(T))</sup> Method. *Methods* 25, 402-408.
4. Abramoff, M.D., Magelhaes, P.J., and Ram, S.J. (2004). Image Processing with ImageJ. *Biophotonics International* 11, 36-42.

## Supplementary Figure Legends

### Figure S1. Expression of pluripotency markers in RTT- iPSC lines.

(A-D) iPSCs derived from different RTT fibroblasts showed expression of pluripotent markers (SSEA3, SSEA4, TRA-1-60, TRA-1-81, OCT4, and NANOG). Regardless of the status of X chromosome inactivation and MeCP2 expression, all RTT-iPS cells similarly expressed pluripotency markers. iPSCs monoallelically expressing wild type MeCP2: RTT1-iPS16w, RTT2-iPS-42w, RTT4-iPS-24w, RTT5-iPS-32w; iPS cells monoallelically expressing only mutant MeCP2: RTT2-iPS-12m, RTT3-iPS-46m; iPS cells biallelically expressing both wild type and mutant MeCP2: RTT4-iPS-19bi, RTT5-iPS-31bi.

### Figure S2. Expression of pluripotency genes in RTT- iPSC lines.

(A-D) Quantitative real time RT-PCR analysis was performed to measure the expression levels of the pluripotency markers: OCT4, SOX2, KLF4, MYC and NANOG in iPSCs, their parental fibroblasts and H1 hESCs. Comparative CT method was used. Gene expression was normalized against  $\beta$ -actin. Gene expression in iPSCs relative to that of fibroblasts was plotted. Data shown are mean  $\pm$  SEM in triplicate experiments. (E) Semi quantitative PCR analysis was performed to examine the expression of endogenous and retroviral genes in RTT-iPSCs. While endogenous OCT4, SOX2, KLF4 and MYC are reactivated in RTT-iPSCs, ectopic genes are silenced, confirming the faithful reprogramming.

### Figure S3. RTT fibroblast-derived iPSCs have a normal karyotype.

(A-D) G-banding analysis showed normal karyotypes of RTT-derived iPSC lines.

### Figure S4. RTT-iPSCs are pluripotent.

(A-H) iPSCs were intramuscularly injected into immune-deficient Rag2<sup>-/-</sup>-GammaC<sup>-/-</sup> mice and teratomas were harvested from 6–8 weeks, and used for Hematoxylin and Eosin (H/E) staining. Teratomas from RTT-iPSCs contained tissues of all three germ layers, confirming their *in vivo* pluripotency (endoderm tissue: intestinal endothelium or respiratory epithelium; mesoderm tissue: smooth muscles, cartilage or bone; and ectoderm tissue: pigmented epithelium or neural rosettes).

### Figure S5. Allele specific MeCP2 expression in RTT-iPSC lines.

(A-C) MeCP2 was amplified from total RNA in the RTT-iPSCs, and subjected to sequencing using primers listed in supplementary table 2. RTT-iPSC clones expressed either a wild type or mutant allele of MeCP2 (RTT2-iPS-12w, RTT2-iPS-13m, RTT3-iPS-42w, RTT3-iPS-46m and RTT5-iPS-31w), or both alleles (RTT5-iPS-32bi).

**Figure S6. X chromosome inactivation status in RTT-iPSCs.**

RTT-iPSCs and their parental fibroblasts were stained with OCT4 antibody, H3K27me3 antibody, and DAPI (A-C). Some iPSC lines (RTT2-iPS-16w, RTT2-iPS-12m, RTT3-iPS-42w, RTT3-iPS-46m, RTT5-iPS-31w) retained the inactive X chromosome of the parental fibroblasts, while other line (RTT5-iPS-32bi) regained the activity of both X chromosomes.

**Figure S7. X chromosome inactivation status in hESCs and normal iPSCs.**

hESC lines and normal iPSC lines were stained for OCT4 and H3K27me3. (A) Male (H1) and biallelic female (H9) ES cells do not have H3K27me3 foci. (B-C) H3K27me3 staining for normal iPSCs derived from female fetal lung fibroblast (Detroit 551) and adult skin fibroblasts (PGP9f). Reprogramming of normal fibroblasts without MeCP2 mutations also show the generation of iPSC lines that either retain the inactive X chromosome or reactivate the inactive X chromosome.

**Figure S8. X chromosome inactivation status in under cellular stress.**

(A) Representative image of H3K27me3 of RTT-iPSCs after long-term culture. (B) Representative image of H3K27me3 staining in iPSCs expanded after freezing and thawing. Even after exposed to stress conditions, RTT-iPSCs maintain the same X chromosome inactivation status as before exposed.

**Figure S9. Neuronal differentiation from RTT-iPSC lines.**

(A) Expression of NESTIN in RTT3-iPSCs undergoing a neural differentiation protocol for 11 days. (B-C) Immunostaining of GFAP and TuJ in RTT3-iPSCs undergoing a neural differentiation protocol for 25 days.

(D) Expression of NESTIN in RTT4-iPSCs undergoing a neural differentiation protocol for 11 days. (E-F) Immunostaining of GFAP and TuJ in RTT4-iPSCs undergoing a neural differentiation protocol for 25 days.

While the neuronal cells differentiated from mutant RTT-iPSCs do not show difference in NESTIN and GFAP expression, they show less TuJ expression than those from H1 hESCs and wild type monoallelic RTT-iPSCs.

**Figure S10. Neuronal differentiation from hESCs and iPSCs.**

(A-B) hESCs (EOS2-DL3), normal iPSCs (PGP1-iPS1), and RTT-iPSCs (RTT5-iPS-13w and RTT5-iPS-32bi) were stained with TuJ and GFAP 25 days after differentiation. Biallelic RTT5-iPS-32bi cells showed less TuJ staining than other cells. All cell lines showed similar GFAP expression.

**Figure S11. Neuronal differentiation from RTT-iPSC-derived homogenous NPCs.**

(A) Immunostaining for NESTIN in NPCs derived hESCs (H1), normal iPSCs (551-iPS-K1, PGP9f-iPS-1), and RTT-iPSCs (RTT4-iPS-24w and RTT4-iPS19bi). All iPSC-derived NPCs are positive for NESTIN. (B) Immunostaining for TuJ in neuron derived from NPCs. While there was no difference in expression of NESTIN, neurons from NPCs derived from biallelic RTT4-iPS-19bi showed less TuJ expression compared with hESCs, normal iPSCs and wild type RTT4-iPS-24w cells.

**Figure S12. Expression of neuronal markers during iPSC differentiation.**

(A-D) Expression of neuronal markers during neural differentiation was analyzed by quantitative real time PCR. qPCR was performed in triplicates, and the average is represented with standard error. Change in gene expression relative to that at Day 0 is represented in logarithmic scale. While wild type RTT4-iPS-24w cells showed induction of mature neuronal marker (TuJ) at a similar level as hES cells, mutant RTT4-iPS-19bi showed less induction. hESCs and wild type or mutant biallelic iPSCs showed the similar expression of glial marker (GFAP).

**Figure S13. Quantification of RTT-iPS cells undergoing apoptosis.**

RTT-iPS-derived NPCs (AB) and mature neurons (DE) were examined by Annexin V/PI FACS assay. FACS assay revealed the early apoptotic cells (bottom right quadrant), viable cells (bottom left quadrant) and necrotic cells (top right quadrant). There was no difference in apoptotic or necrotic cells in NPCs or neurons from wild type and mutant RTT-iPS cells. (CF) The apoptotic cell death of NPCs (C) and mature neurons (F) was measured by trypan blue staining. Consistent with the result from AnnexinV/PI FACS, difference in apoptosis was not observed between wild type and mutant RTT-iPS cells. Data are mean $\pm$ SD of three independent experiments.



**Table S1. iPSC cell clones isolated and analyzed.**

| <b>Experiments/Clones</b>              | <b>RTT1-iPSC<br/>GM17880</b> |          |           | <b>RTT2-iPSC<br/>GM16548</b> |          |           | <b>RTT3-iPSC<br/>GM07982</b> |          |           | <b>RTT4-iPSC<br/>GM11270</b> |          |           | <b>RTT5-iPSC<br/>GM17567</b> |          |           | <b>551-iPSC</b> |           | <b>PGP9f-iPSC</b> |           |
|----------------------------------------|------------------------------|----------|-----------|------------------------------|----------|-----------|------------------------------|----------|-----------|------------------------------|----------|-----------|------------------------------|----------|-----------|-----------------|-----------|-------------------|-----------|
| <b>Derived</b>                         | 12                           |          |           | 8                            |          |           | 10                           |          |           | 11                           |          |           | 9                            |          |           | 7               |           | 5                 |           |
| <b>Allele Specificity of<br/>MeCP2</b> | <b>W</b>                     | <b>M</b> | <b>Bi</b> | <b>Mono</b>     | <b>Bi</b> | <b>Mono</b>       | <b>Bi</b> |
|                                        | 3                            | 3        | 4         | 2                            | 3        | 2         | 3                            | 2        | 3         | 3                            | 4        | 4         | 2                            | 2        | 3         | 5               | 2         | 3                 | 2         |
| <b>H3K27me3</b>                        | 6                            |          |           | 6                            |          |           | 6                            |          |           | 5                            |          |           | 5                            |          |           | 7               |           | 5                 |           |
| <b>Karyotype</b>                       | 2                            |          |           | 2                            |          |           | 2                            |          |           | 2                            |          |           | 2                            |          |           | N/A             |           | 1                 |           |
| <b>Teratoma</b>                        | 2                            |          |           | 2                            |          |           | 2                            |          |           | 2                            |          |           | 2                            |          |           | N/A             |           | 2                 |           |
| <b>EZH2</b>                            | 4                            |          |           | 4                            |          |           | 5                            |          |           | 5                            |          |           | 3                            |          |           | N/A             |           | N/A               |           |
| <b>Neural differentiation</b>          | 2                            |          |           | N/A                          |          |           | 2                            |          |           | 2                            |          |           | 2                            |          |           | 2               |           | 1                 |           |

**Table S2. Primers used for real time-quantitative PCR**

| Gene       | Forward primer             | Reverse primer           |
|------------|----------------------------|--------------------------|
| ACTB       | TGAAGTGTGACGTGGACATC       | GGAGGAGCAATGATCTTGAT     |
| NANOG      | TGAACCTCAGCTACAAACAG       | TGGTGGTAGGAAGAGTAAAG     |
| Total OCT4 | AGCGAACCAGTATCGAGAAC       | TTACAGAACCACACTCGGAC     |
| Total SOX2 | AGCTACAGCATGATGCAGGA       | GGTCATGGAGTTGTACTIONGCA  |
| Total KLF4 | TCTCAAGGCACACCTGCGAA       | TAGTGCCTGGTCAGTTCATC     |
| Total cMYC | ACTCTGAGGAGGAACAAGAA       | TGGAGACGTGGCACCTCTT      |
| Endo-OCT4  | CCTCACTTCACTGCACTGTA       | CAGGTTTTCTTTCCCTAGCT     |
| Endo-SOX2  | CCCAGCAGACTTCACATGT        | CCTCCATTTCCTCGTTTT       |
| Endo-KLF4  | GATGAACTGACCAGGCACTA       | GTGGGTCATATCCACTGTCT     |
| Endo-cMYC  | TGCCTCAAATTGGACTTTGG       | GATTGAAATTCTGTGTACTIONGC |
| Ecto-OCT4  | CCTCACTTCACTGCACTGTA       | CCTTGAGGTACCAGAGATCT     |
| Ecto-SOX2  | CCCAGCAGACTTCACATGT        | CCTTGAGGTACCAGAGATCT     |
| Ecto-KLF4  | GATGAACTGACCAGGCACTA       | CCTTGAGGTACCAGAGATCT     |
| Ecto-cMYC  | TGCCTCAAATTGGACTTTGG       | CGCTCGAGGTTAACGAATT      |
| PAX6       | TGGGCGCAGACGGCATGTAT       | CGTAGGTTGCCCTGGCACCG     |
| SCNA       | ATCGGCAATTCCGTGGGGGC       | CCCACACAGCACGCGGAACA     |
| SCNB       | ATCTCCTGCAAGCGCCGCAG       | GTGGCACTCGTAGTCGCCCCG    |
| GFAP       | TGCTCGCCGCTCCTACGTCT       | ATCCACCCGGGTCGGGAGTG     |
| SOX1       | GATCAGCAAGCGCCTGGGGG       | AGCAGCGTCTTGGTCTTGCGG    |
| TuJ        | GCCGCTACCTGACGGTGGC        | GGGCGGGATGTACACACCGG     |
| BDNF       | CCACCAGGTGAGAAGAGTGATGACCA | GCCTTGGGCCCATTACAGCT     |
| MECP2      | AGAAACGGGGCCGAAAGCCG       | GCAACCGCGGGCTGAGTCTT     |
| EZH2       | ACCGGTTGTGGGCTGCACAC       | TGCAGCGGCATCCCGGAAAG     |



**Table S3. Sequences of primers used to amplify and sequence MeCP2.**

| <b>Cell Line</b>     | <b>Forward &amp; sequencing primer</b> | <b>Reverse primer</b> |
|----------------------|----------------------------------------|-----------------------|
| RTT1                 | ATGGCCGCCGCTGCCGCCACCGCC               | CACCACTTCCTTGACCTCGA  |
| RTT2<br>RTT3<br>RTT4 | AGGTAGGCGACACATCCCT                    | CTTACAGGTCTTCAGGACCTT |
| RTT5                 | AGAAACGGGGCCGAAAGCCG                   | CGGGAAGCTTTGTCAGAGCC  |

**Table S4. Antibodies used in this study**

| <b>Antibody</b> | <b>Catalogue Number</b> | <b>Company</b>            |
|-----------------|-------------------------|---------------------------|
| OCT4            | Ab19857                 | Abcam                     |
| Tra-1-60        | BD560173                | BD Biosciences            |
| Tra-1-81        | BD560174                | BD Biosciences            |
| SSEA3           | MAB4303                 | Milipore                  |
| SSEA4           | BD560218                | BD Biosciences            |
| NANOG           | Ab21624                 | Abcam                     |
| TuJ             | Sc-58888                | Santa Cruz                |
| TuJ             | ab18207                 | Abcam                     |
| GFAP            | MO15052                 | Gentaur                   |
| NESTIN          | Sc-71665                | Santa Cruz                |
| H3K27me3        | Rabbit mAb #9733        | Cell signaling technology |
| Alexa Fluor 488 | A11001, A11008          | Invitrogen                |
| Alexa Fluor 555 | A31572, A21422          | Invitrogen                |

Figure S1.

A

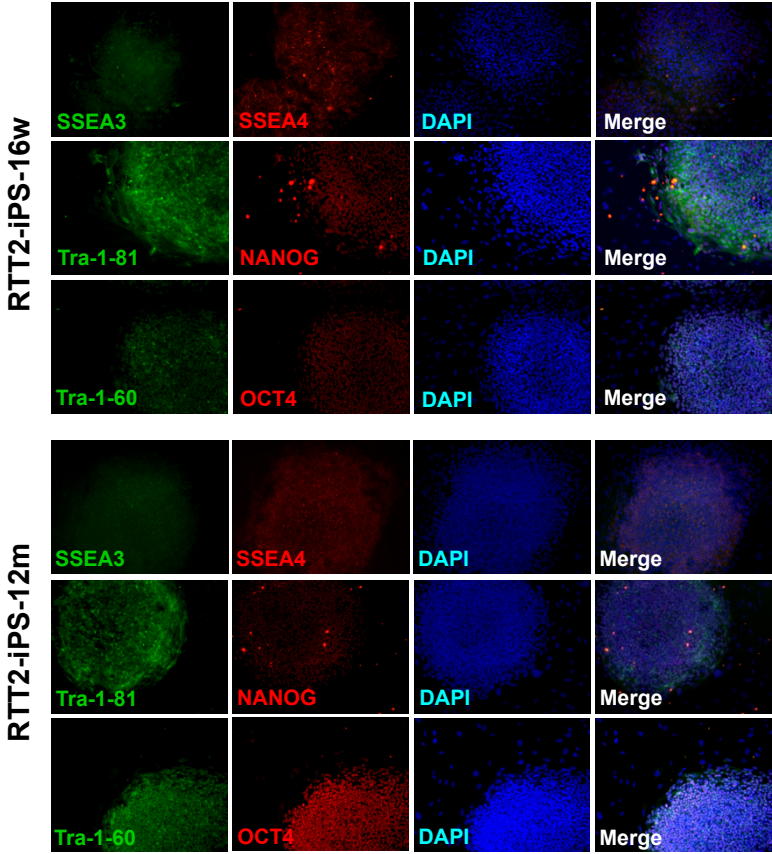

B

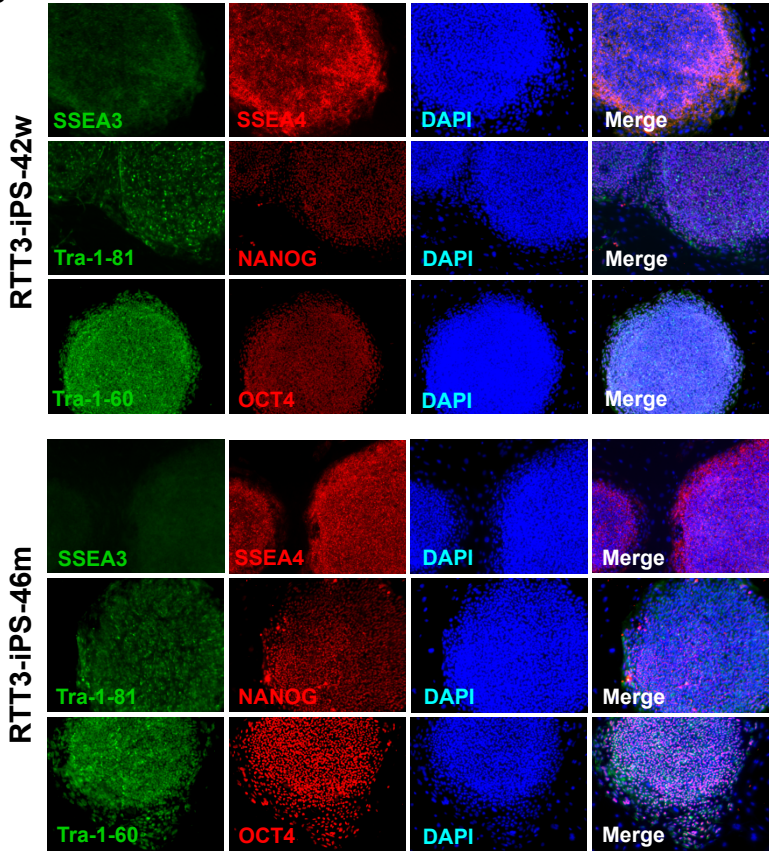

Figure S1.

C

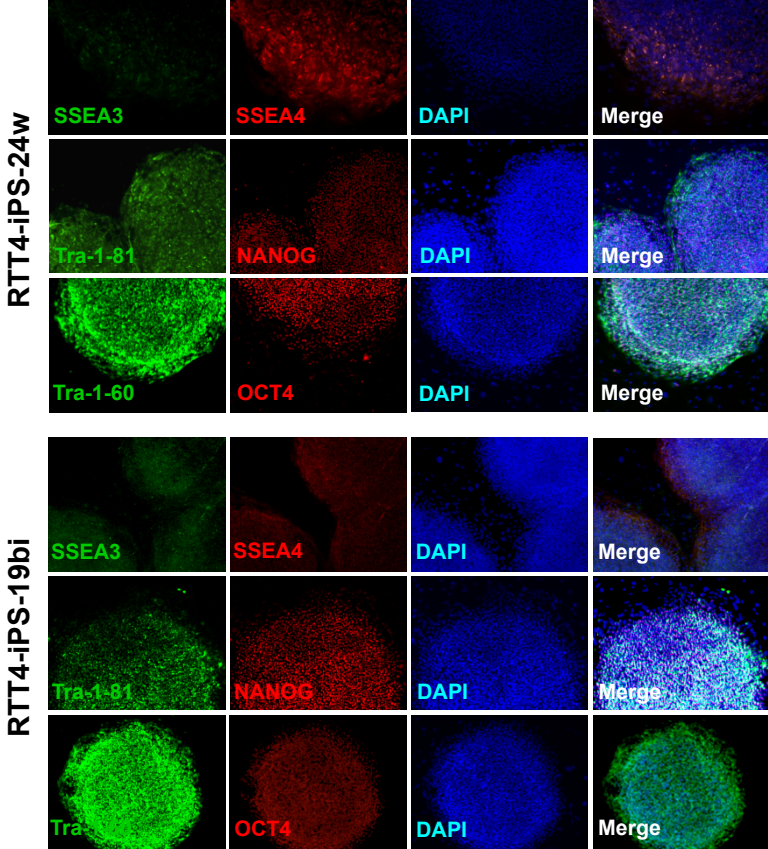

D

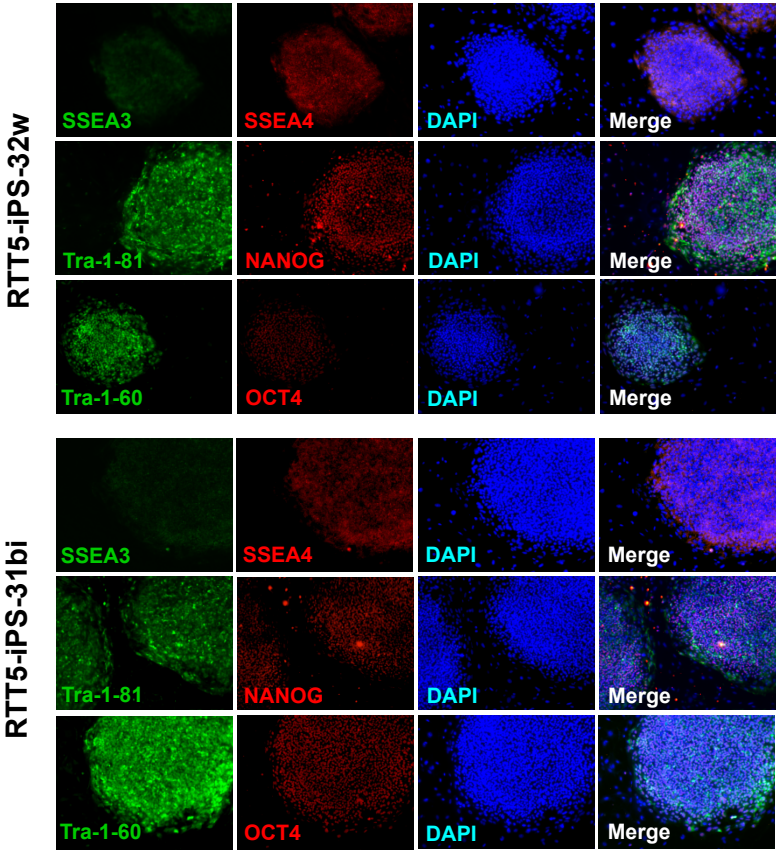

Figure S2.

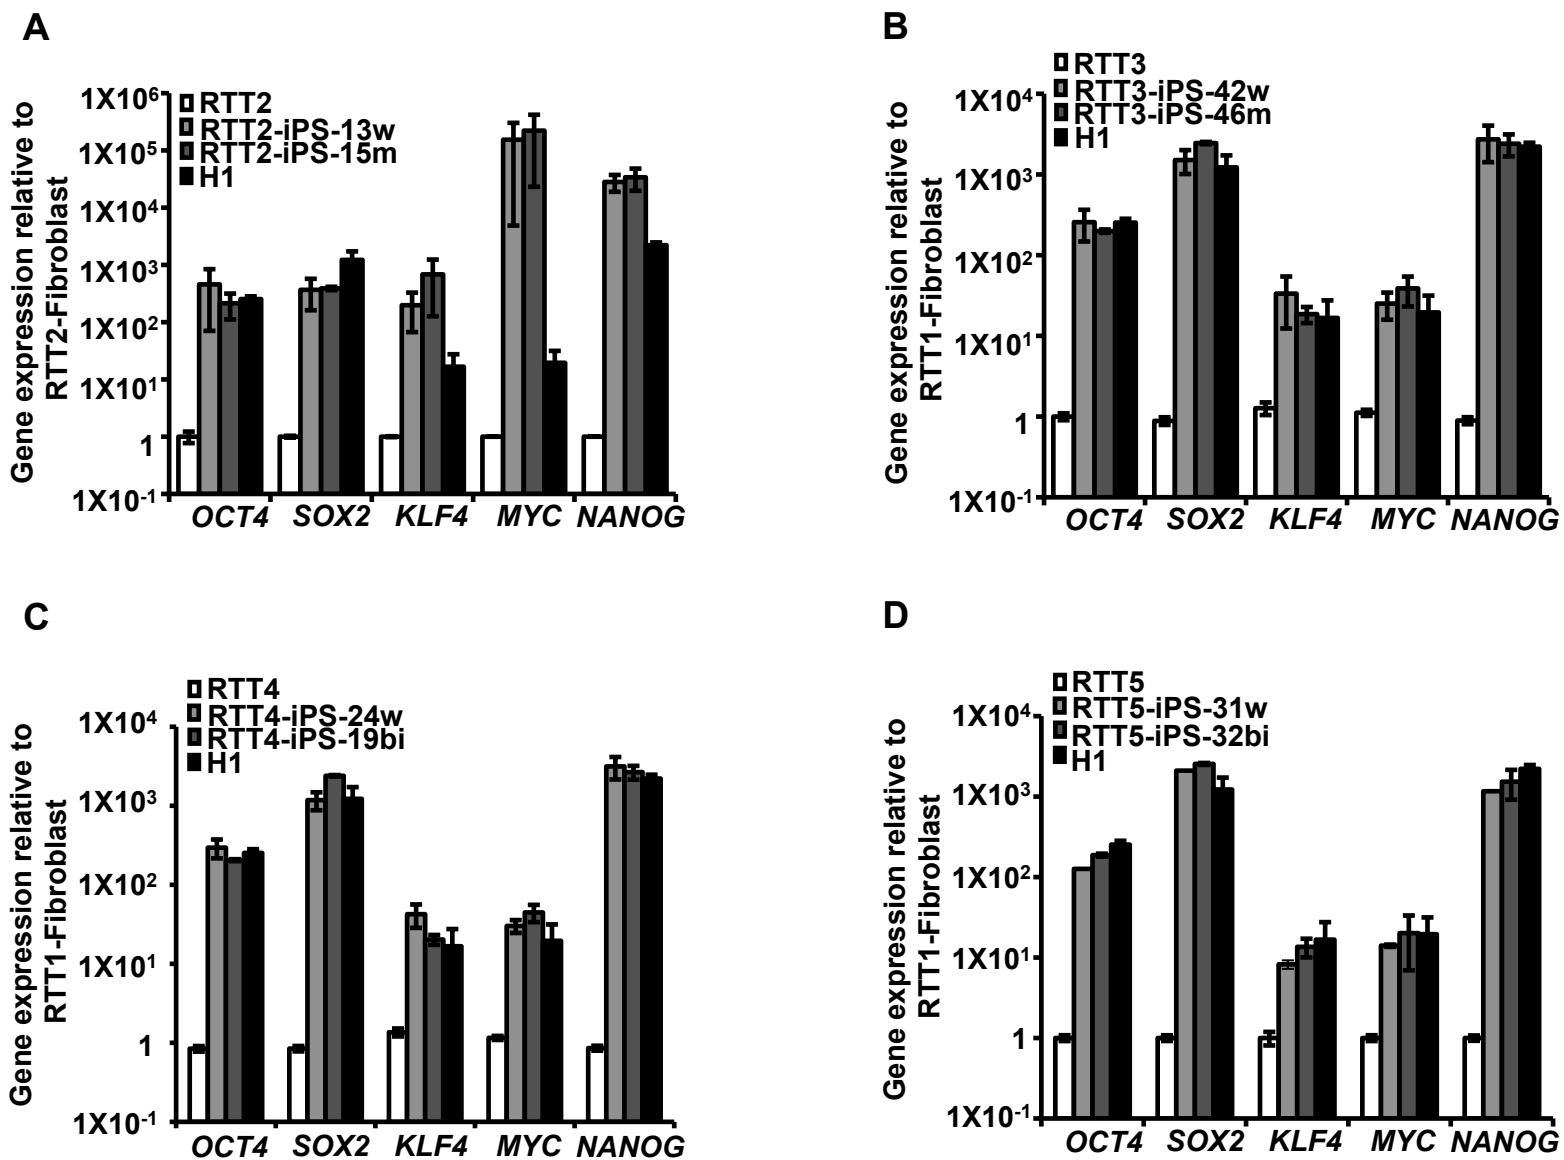

Figure S2.

F

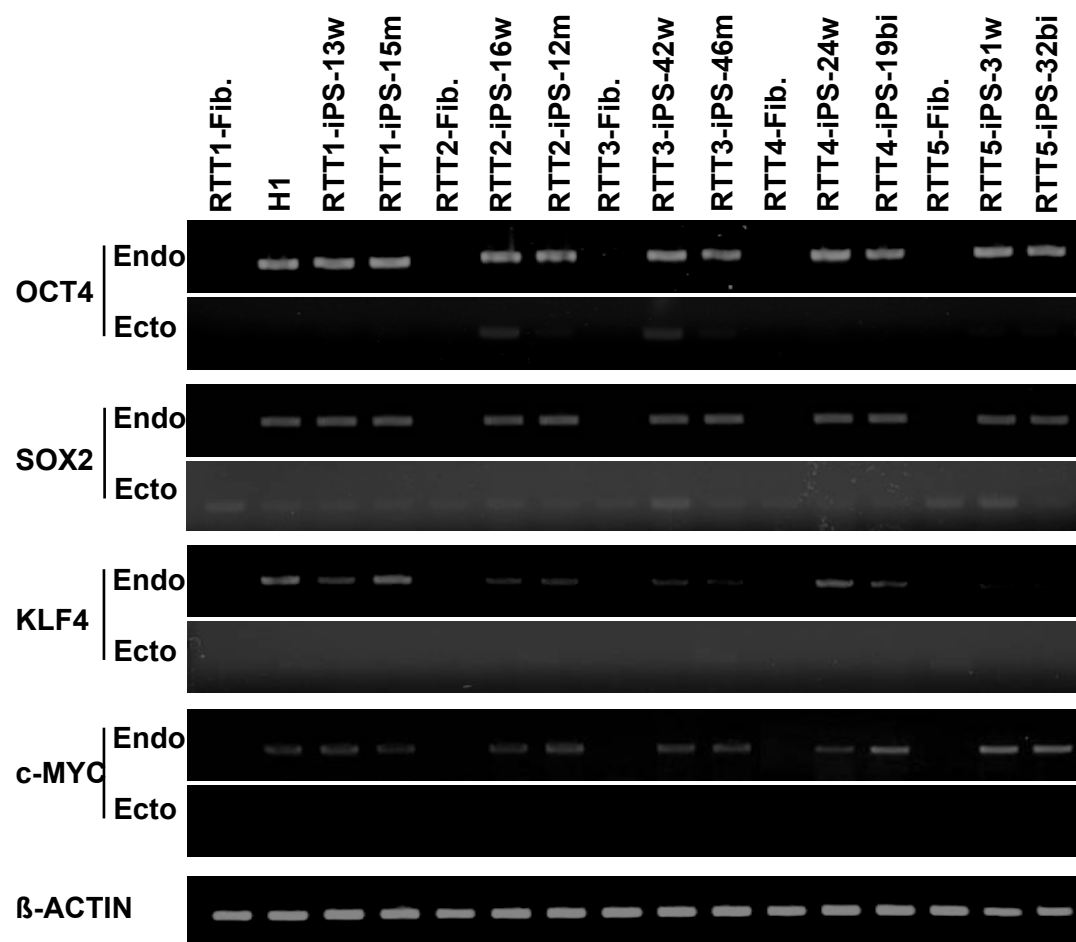

Figure S3.

A

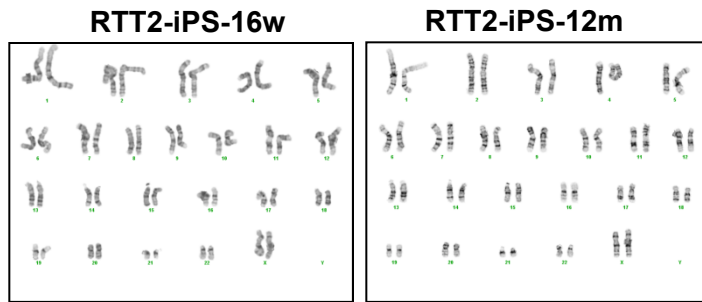

B

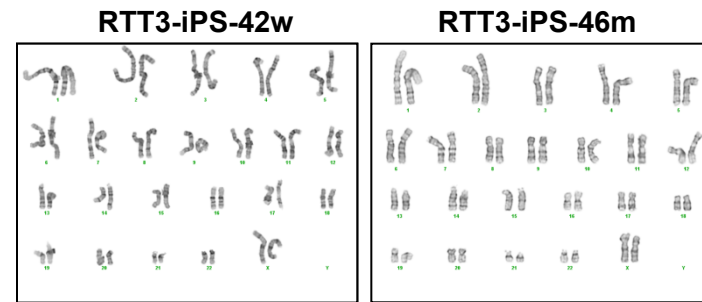

C

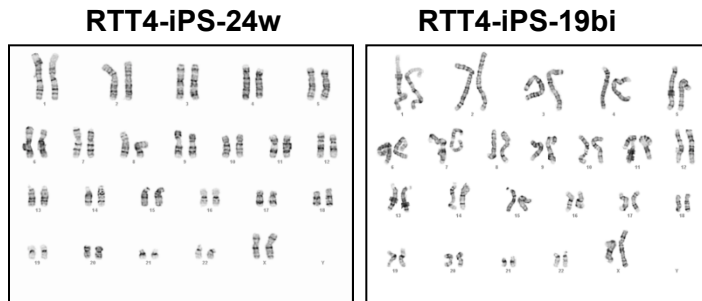

D

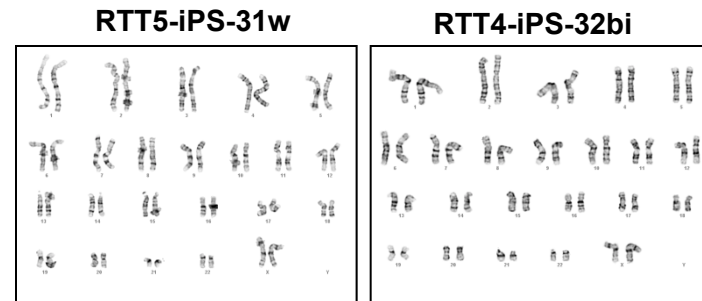

Figure S4.

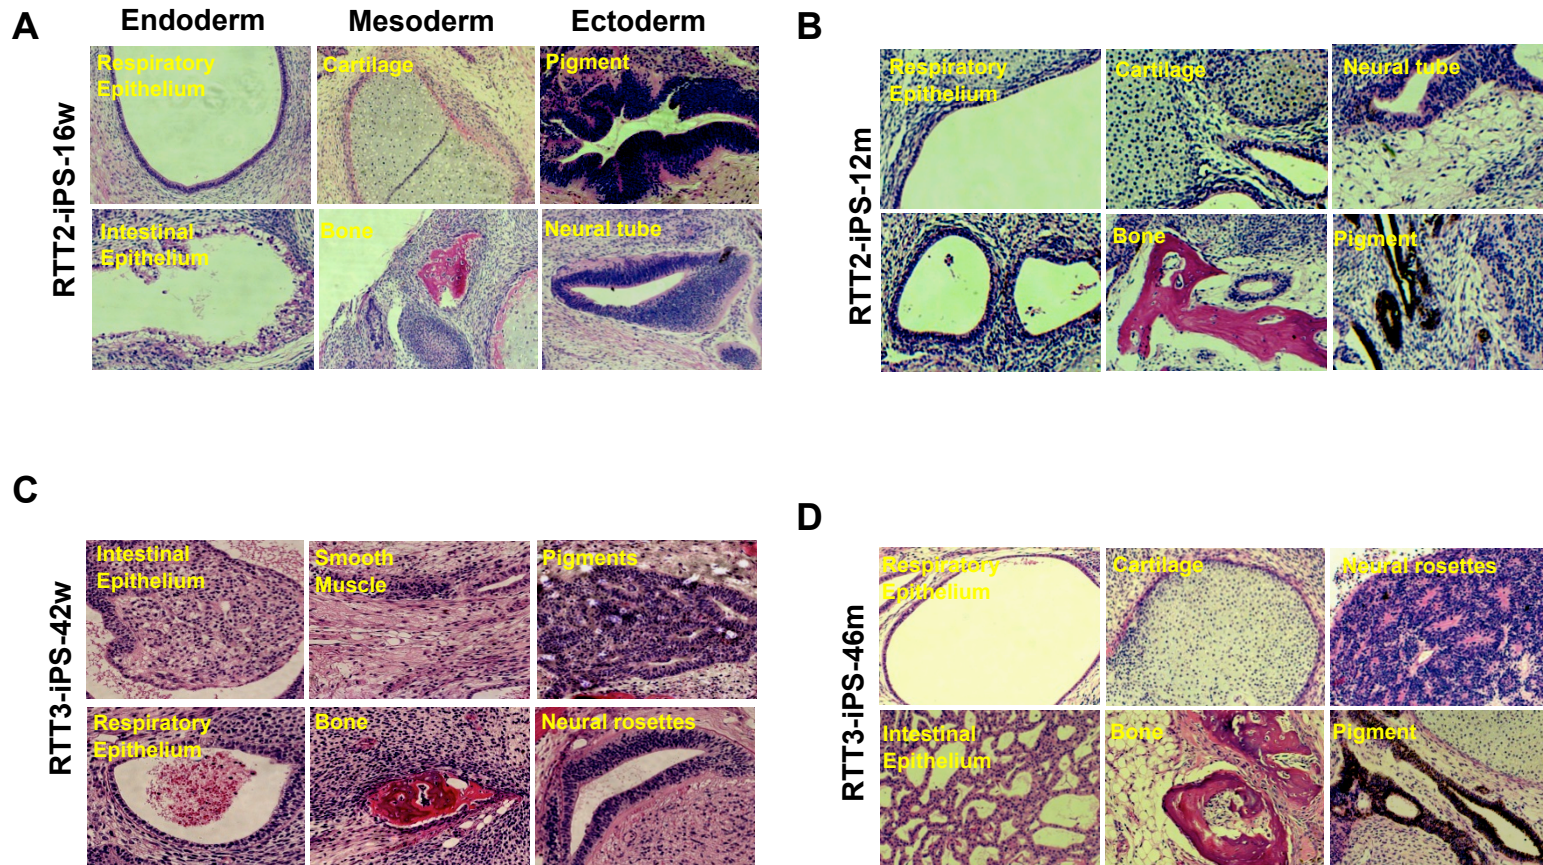



Figure S4.

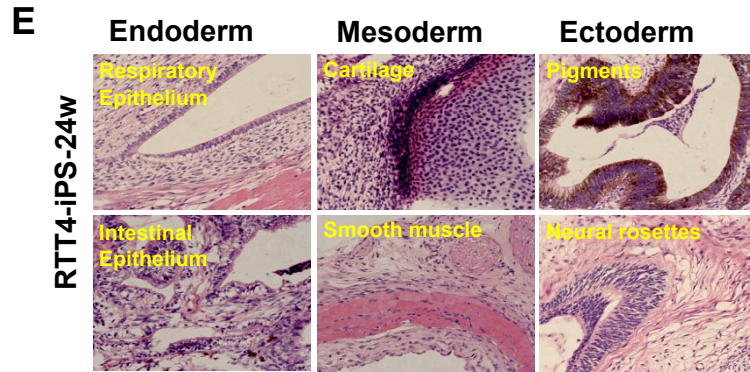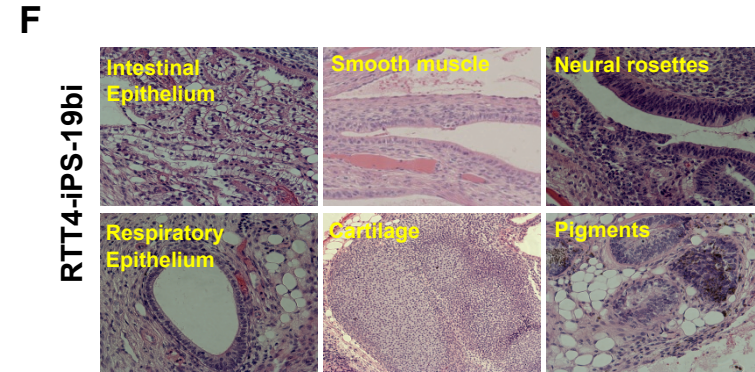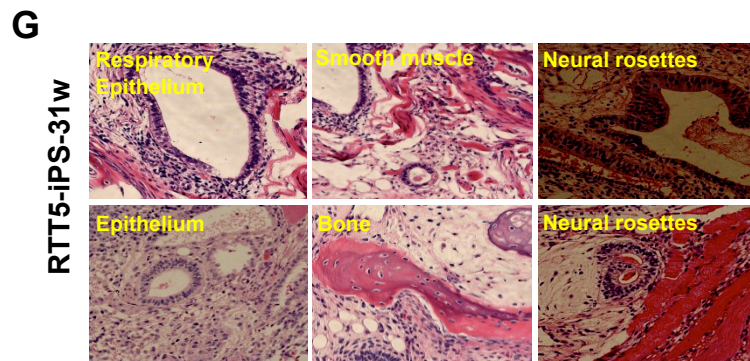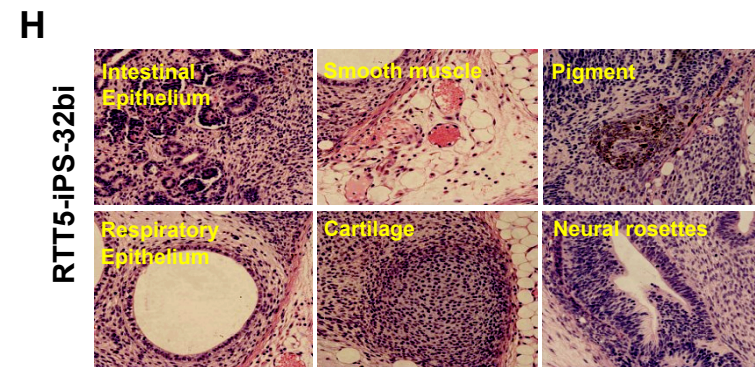

Figure S5.

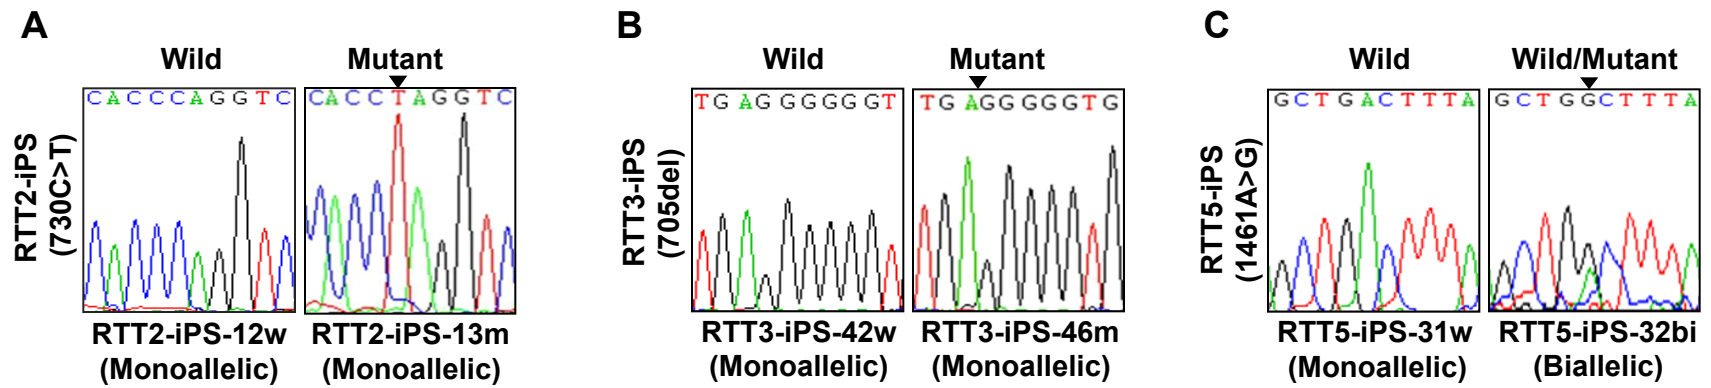

Figure S6.

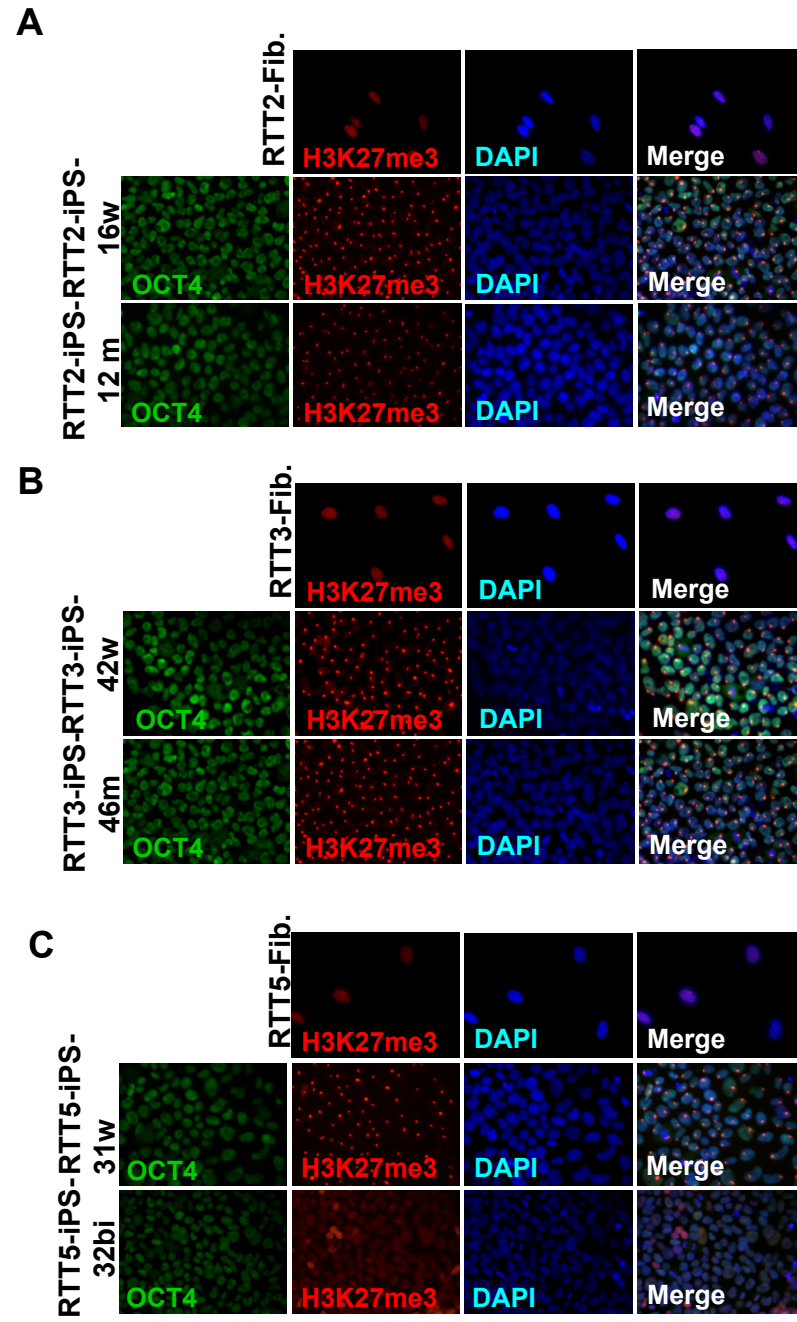

Figure S7.

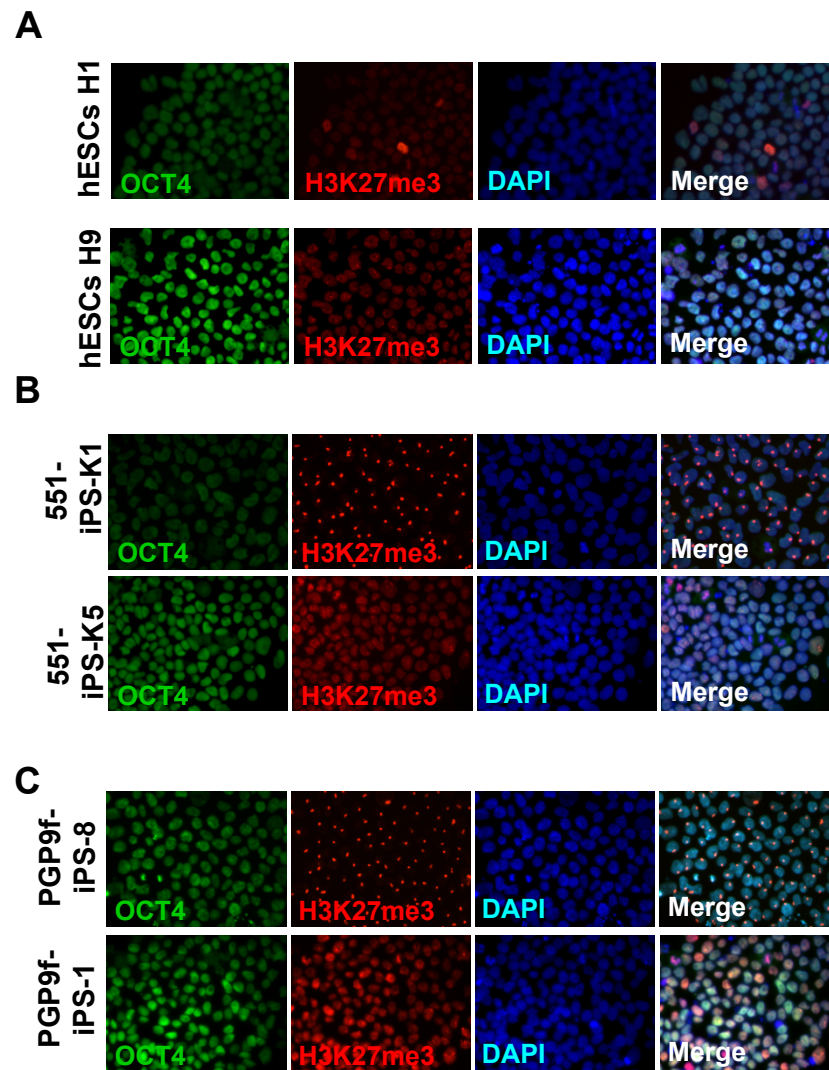

Figure S8.

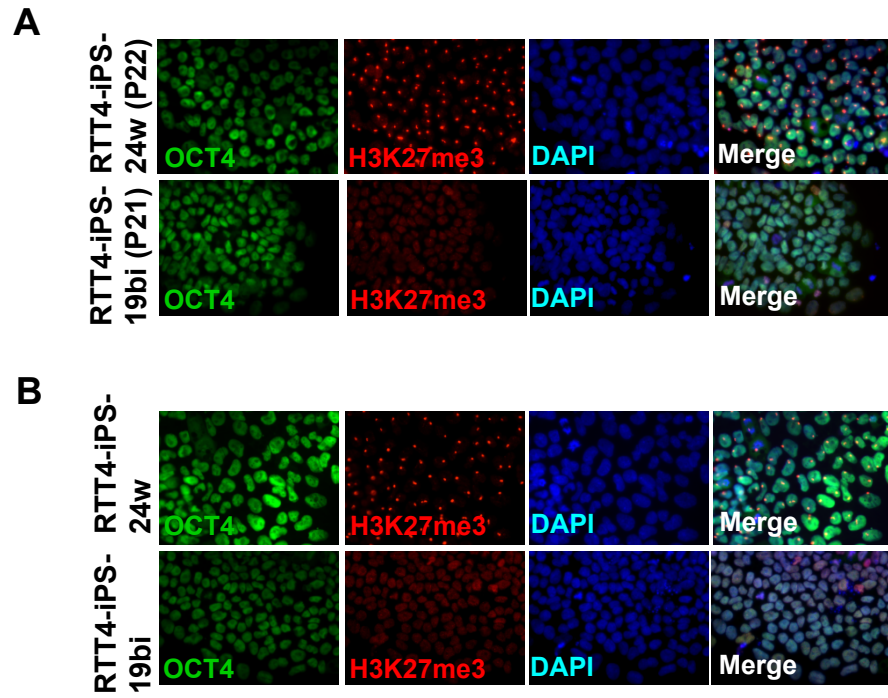

Figure S9.

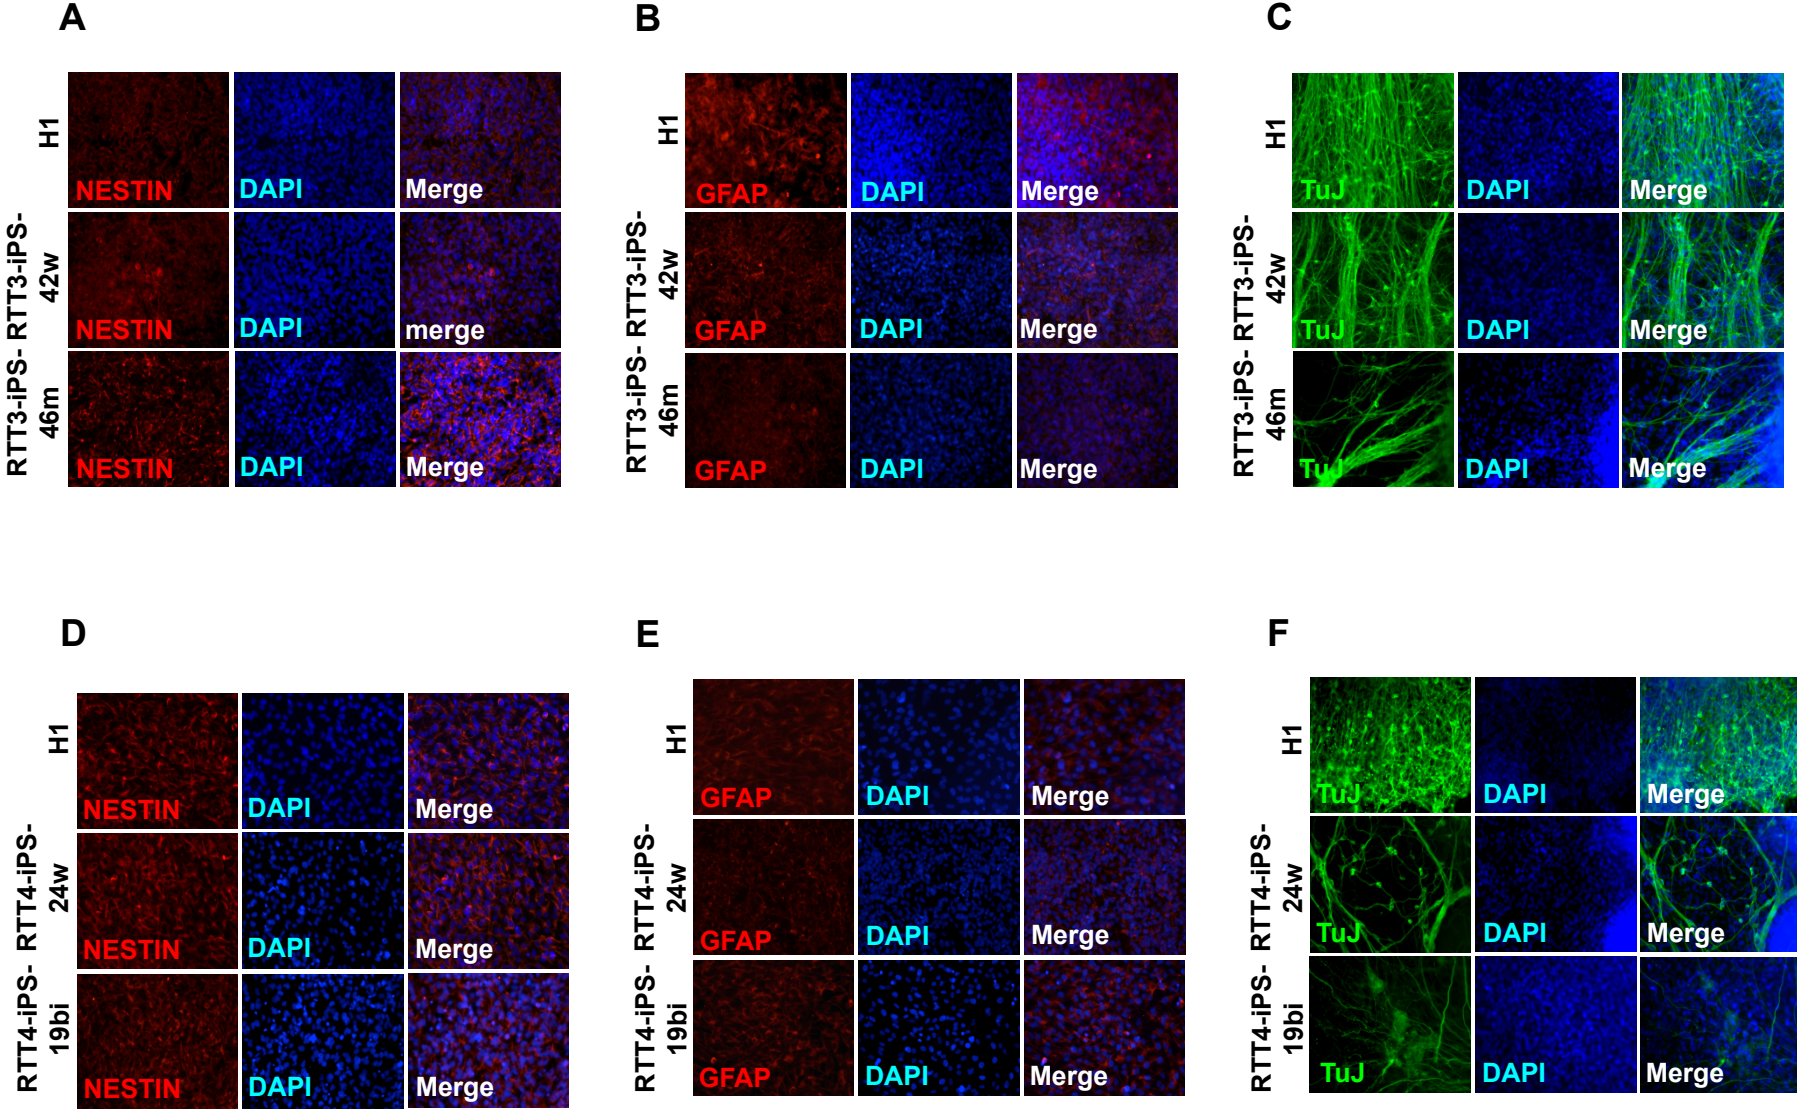

Figure S10.

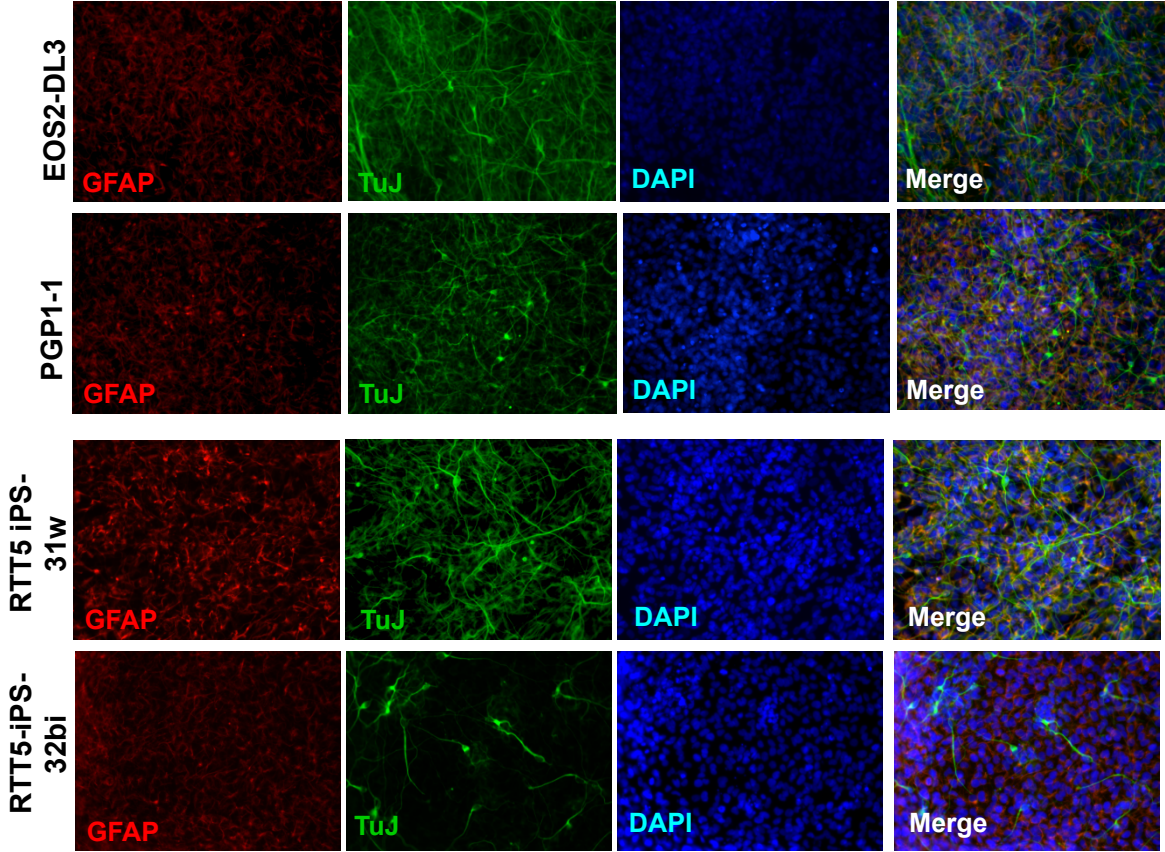

Figure S11

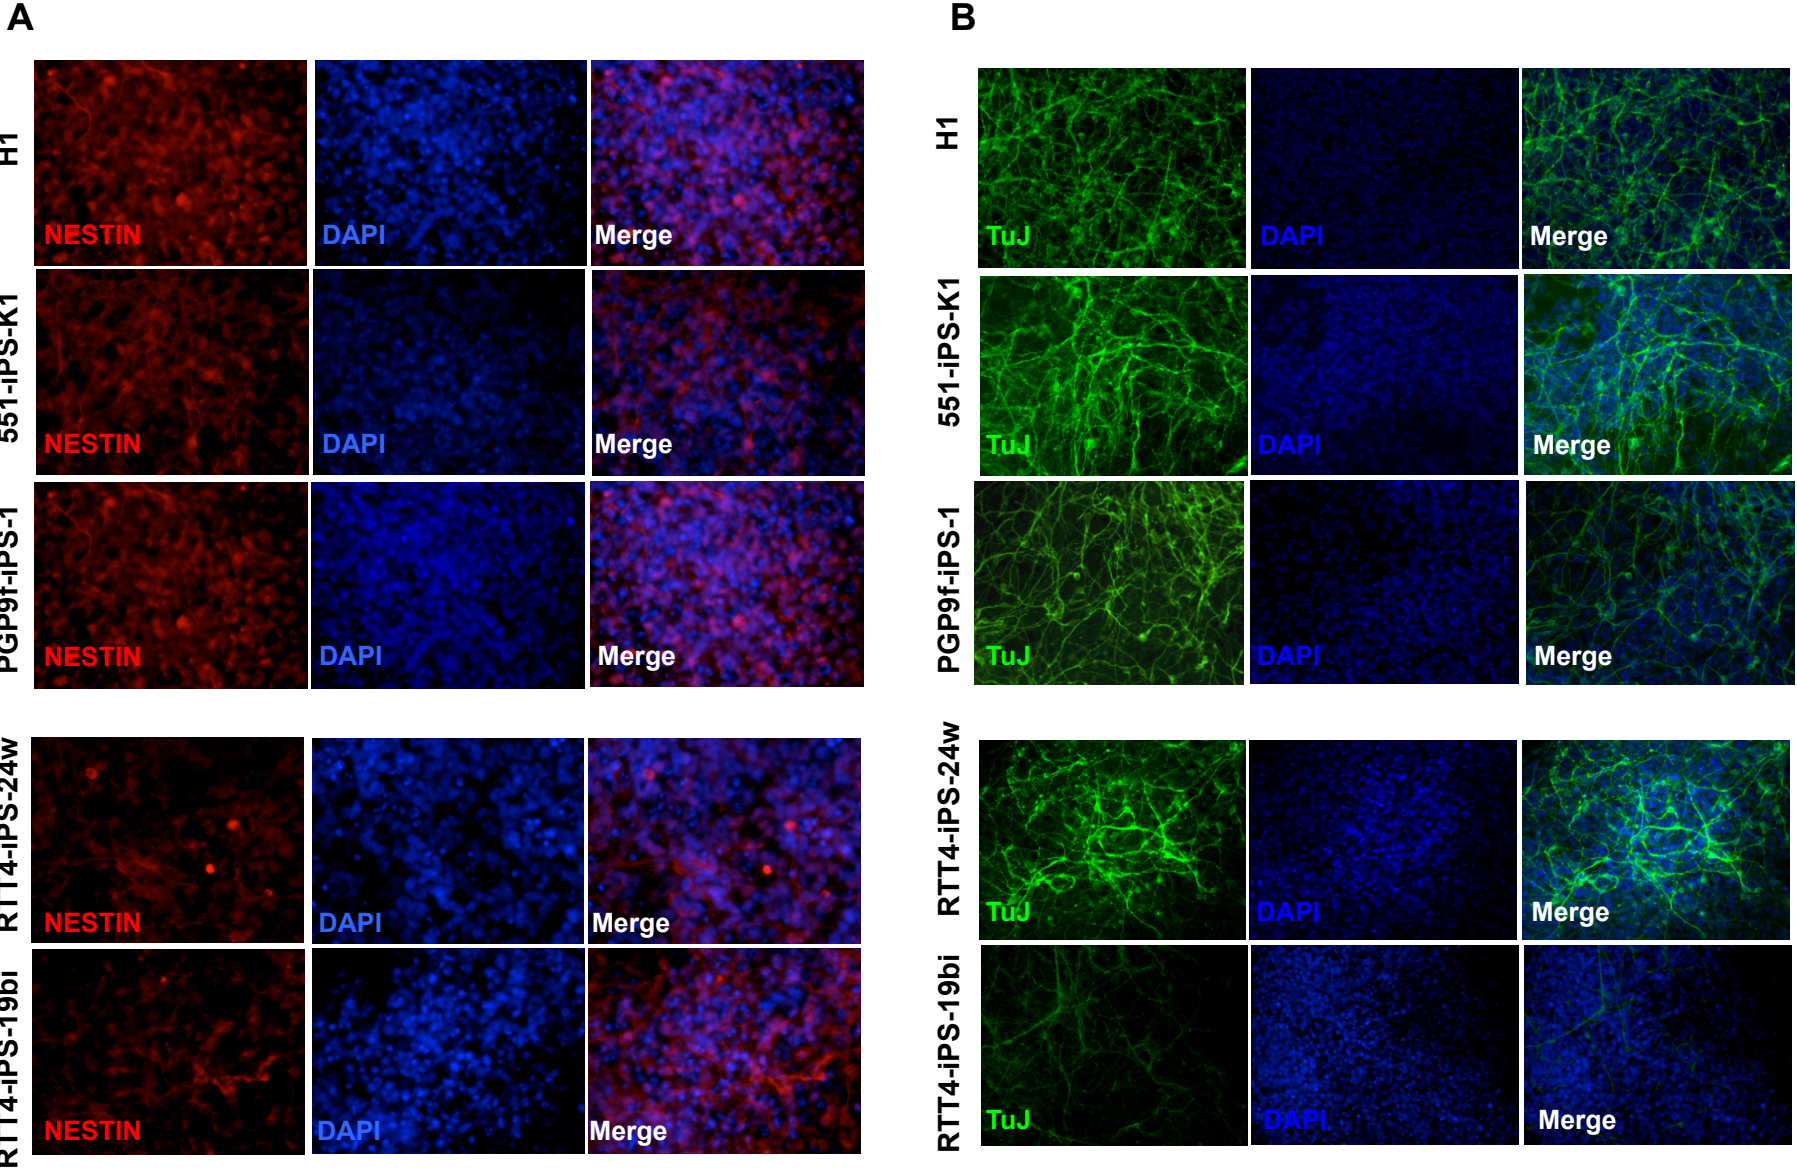



Figure S12

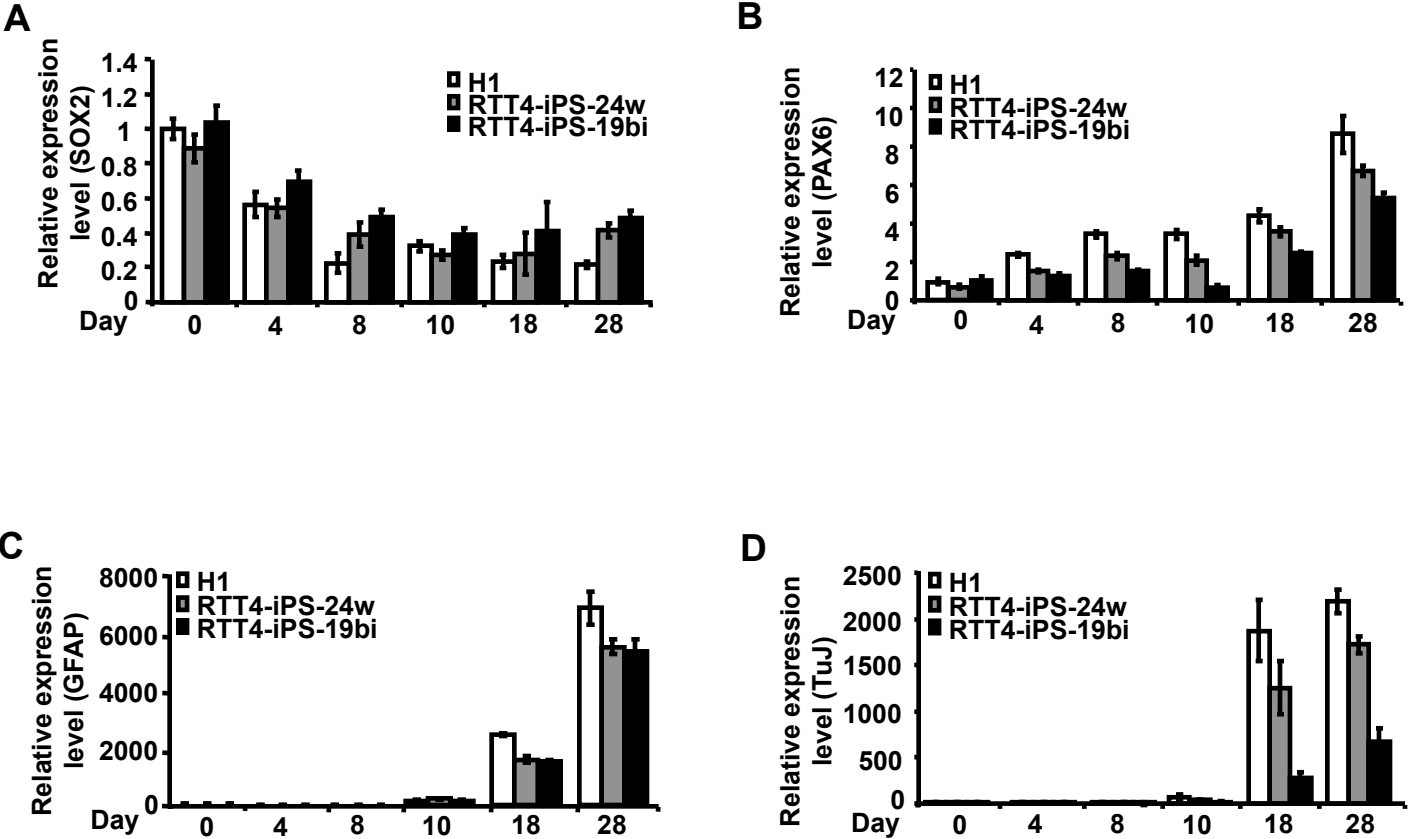

Figure S13

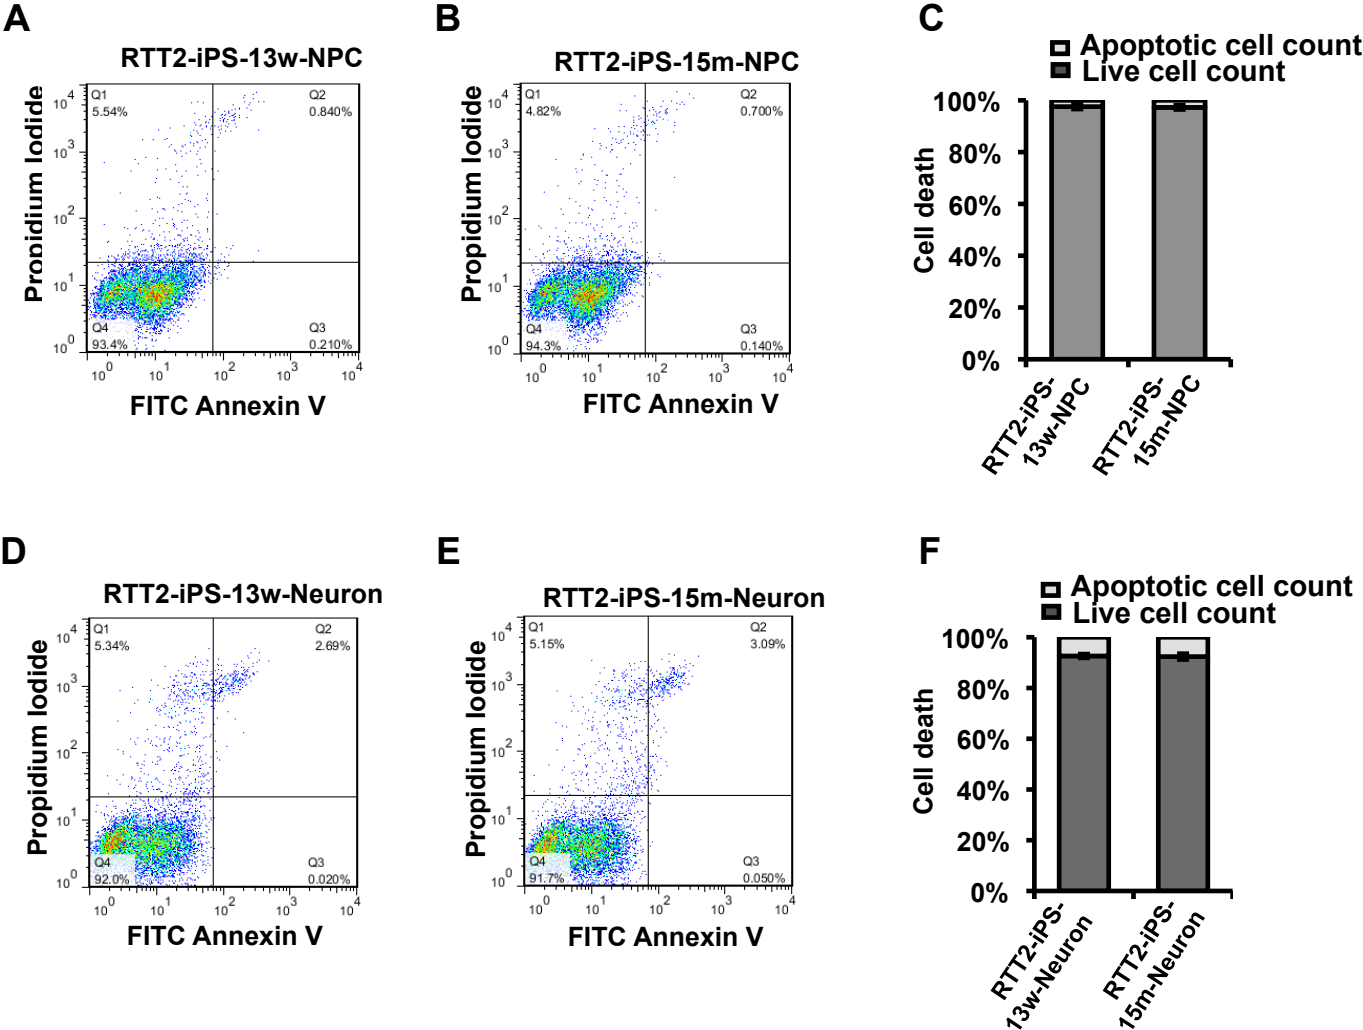

Supplement: 1018979108_sapp.pdf [file 1018979108_sapp.pdf]
